# Supplementary material for: Global decrease of serotonin-1A receptor binding after electroconvulsive therapy in major depression measured by PET
Source: PubMed Central journal article supplement — Mol Psychiatry. 2012 Jul 3;18(1):93–100. doi: 10.1038/mp.2012.93 (PMC3526726; doi:10.1038/mp.2012.93), 2012-07-03
Supplement: mp201293x1.pdf [file mp201293x1.pdf]

## SUPPLEMENTARY TABLE S1

Serotonin-1A receptor (5-HT<sub>1A</sub>) binding potential (BP<sub>ND</sub>) for regions of interest (ROI) taken from an AAL-based atlas (Tzourio-Mazoyer et al. 2002, Stein et al. 2008). 5-HT<sub>1A</sub> BP<sub>ND</sub> values are given as mean±SD at baselines before ECT (PET1, PET2) and after electroconvulsive therapy (PET3). Following voxel-wise *post-hoc* t-test of the repeated measures ANOVA, peak t-values (\*t>2.31, p<0.05 FDR-corrected, single voxel) and relative changes [%] are obtained when comparing 5-HT<sub>1A</sub> binding before (PET2) vs. after ECT (PET3). MNI coordinates are given for the peak voxels.

### References

- Tzourio-Mazoyer N, Landeau B, Papathanassiou D, Crivello F, Etard O, Delcroix N *et al.* Automated anatomical labeling of activations in SPM using a macroscopic anatomical parcellation of the MNI MRI single-subject brain. *Neuroimage* 2002; **15**(1): 273-289.
- Stein P, Savli M, Wadsak W, Mitterhauser M, Fink M, Spindelegger C *et al.* The serotonin-1A receptor distribution in healthy men and women measured by PET and [carbonyl-<sup>11</sup>C]WAY-100635. *Eur J Nucl Med Mol Imaging* 2008; **35**(12): 2159-2168.

| Region                     | MNI coordinates [mm] |     |     | 5-HT <sub>1A</sub> binding potential |            |           | 5-HT <sub>1A</sub> bef. vs. after ECT |              |
|----------------------------|----------------------|-----|-----|--------------------------------------|------------|-----------|---------------------------------------|--------------|
|                            | x                    | y   | z   | PET1                                 | PET2       | PET3      | Peak t-value                          | % -change    |
|                            |                      |     |     | Before ECT                           | Before ECT | After ECT |                                       |              |
| <b>Frontal lobe</b>        |                      |     |     |                                      |            |           |                                       |              |
| Inferior frontal orbital L | -38                  | 24  | -10 | 3.9 ± 0.9                            | 3.9 ± 1.1  | 3.1 ± 1.1 | 4.24*                                 | -22.2 ± 19   |
| Inferior frontal orbital R | 48                   | 18  | -4  | 3.6 ± 1.1                            | 3.8 ± 1.1  | 3 ± 0.9   | 4.38*                                 | -22.6 ± 19.5 |
| Middle frontal L           | -40                  | 32  | 34  | 4.4 ± 1                              | 4.4 ± 1.2  | 3.3 ± 0.9 | 4.92*                                 | -23.1 ± 19   |
| Middle frontal R           | 38                   | 42  | 34  | 4.6 ± 0.9                            | 4.6 ± 1.2  | 3.3 ± 0.9 | 5.14*                                 | -28.6 ± 15.7 |
| Middle frontal orbital L   | -10                  | 66  | -12 | 5.5 ± 1.5                            | 5.7 ± 1.7  | 4 ± 1.4   | 4.08*                                 | -28.6 ± 29   |
| Middle frontal orbital R   | 12                   | 52  | -6  | 2.4 ± 0.9                            | 2.6 ± 1    | 1.9 ± 0.7 | 4.37*                                 | -24.9 ± 20.1 |
| Superior frontal L         | -20                  | -6  | 70  | 3.6 ± 0.5                            | 3.7 ± 0.7  | 2.6 ± 0.7 | 5.08*                                 | -29.1 ± 13.6 |
| Superior frontal R         | 24                   | 20  | 60  | 4.2 ± 0.8                            | 4.3 ± 1.1  | 3.2 ± 0.8 | 4.85*                                 | -23 ± 14.1   |
| Sup. frontal orbital L     | -12                  | 66  | -12 | 5.5 ± 1.4                            | 5.9 ± 1.8  | 4 ± 1.5   | 4.17*                                 | -30.1 ± 28.2 |
| Sup. frontal orbital R     | 22                   | 68  | -6  | 5.6 ± 0.9                            | 5.5 ± 1.1  | 4.1 ± 1.3 | 4.77*                                 | -26.4 ± 19.3 |
| <b>Temporal lobe</b>       |                      |     |     |                                      |            |           |                                       |              |
| Inferior temporal L        | -54                  | -54 | -4  | 5.4 ± 1.4                            | 5.3 ± 1.5  | 3.8 ± 1.1 | 4.3*                                  | -26.2 ± 21.3 |
| Inferior temporal R        | 60                   | -34 | -22 | 5.9 ± 1.6                            | 5.9 ± 1.6  | 4.1 ± 1.5 | 4.39*                                 | -28.4 ± 23.7 |
| Middle temporal L          | -54                  | -56 | -2  | 5.6 ± 1.1                            | 5.4 ± 1.4  | 3.8 ± 0.9 | 5.07*                                 | -28.7 ± 17.3 |
| Middle temporal R          | 52                   | -60 | 14  | 5.4 ± 1.4                            | 5.3 ± 1.3  | 4 ± 1.2   | 5.19*                                 | -26 ± 15.9   |
| Superior temporal L        | -54                  | -8  | -12 | 6.4 ± 1.7                            | 6.7 ± 2.3  | 4.7 ± 1.8 | 3.92*                                 | -28 ± 29     |
| Superior temporal R        | 50                   | -14 | 2   | 2.8 ± 0.6                            | 2.7 ± 0.7  | 2.1 ± 0.6 | 4.4*                                  | -24.6 ± 21.9 |
| <b>Parietal lobe</b>       |                      |     |     |                                      |            |           |                                       |              |
| Superior parietal L        | -40                  | -54 | 64  | 3.1 ± 1                              | 3.2 ± 1    | 2.2 ± 0.5 | 4.38*                                 | -26.8 ± 24.5 |
| Superior parietal R        | 38                   | -66 | 56  | 3.4 ± 0.6                            | 3.6 ± 0.8  | 2.6 ± 0.6 | 5.11*                                 | -25.1 ± 18.4 |
| Inferior parietal L        | -34                  | -42 | 44  | 2.5 ± 0.9                            | 2.6 ± 1    | 1.8 ± 0.7 | 5.08*                                 | -30.2 ± 17.6 |
| Inferior parietal R        | 44                   | -46 | 58  | 3.9 ± 0.7                            | 4.1 ± 1    | 3.2 ± 0.9 | 4.62*                                 | -21.8 ± 12   |
| Precuneus L                | -12                  | -54 | 18  | 1.3 ± 0.4                            | 1.2 ± 0.4  | 1 ± 0.3   | 4.31*                                 | -22.5 ± 16.9 |
| Precuneus R                | 6                    | -60 | 28  | 3 ± 0.5                              | 2.9 ± 0.5  | 2.3 ± 0.6 | 4.31*                                 | -21.1 ± 19.8 |
| <b>Occipital lobe</b>      |                      |     |     |                                      |            |           |                                       |              |
| Cuneus L                   | -10                  | -88 | 24  | 1.9 ± 0.8                            | 1.9 ± 0.7  | 1.5 ± 0.6 | 4.49*                                 | -16.5 ± 18.5 |
| Cuneus R                   | 6                    | -80 | 32  | 2.7 ± 0.6                            | 2.5 ± 0.8  | 2 ± 0.5   | 4.31*                                 | -18.5 ± 16.1 |
| Inferior occipital L       | -36                  | -72 | -14 | 3.3 ± 1.2                            | 3.1 ± 1.5  | 2.3 ± 0.8 | 3.03*                                 | -22 ± 18.6   |
| Inferior occipital R       | 48                   | -72 | -4  | 4.5 ± 1.4                            | 4.4 ± 1.5  | 3.2 ± 1   | 3.7*                                  | -21.8 ± 30.2 |
| Middle occipital L         | -36                  | -70 | 18  | 2.1 ± 0.9                            | 2.2 ± 0.9  | 1.7 ± 0.6 | 4.1*                                  | -20.6 ± 19.5 |
| Middle occipital R         | 32                   | -80 | 32  | 4.2 ± 1                              | 4 ± 0.9    | 2.9 ± 0.6 | 4.66*                                 | -26.7 ± 17.8 |
| Superior occipital L       | -12                  | -90 | 26  | 2.3 ± 0.7                            | 2.2 ± 0.8  | 1.8 ± 0.4 | 3.44*                                 | -17 ± 25.9   |
| Superior occipital R       | 22                   | -82 | 38  | 2.6 ± 0.8                            | 2.8 ± 0.8  | 2 ± 0.7   | 4.63*                                 | -25.9 ± 21.5 |
| <b>Limbic areas</b>        |                      |     |     |                                      |            |           |                                       |              |
| Anterior cingulate L       | -2                   | 40  | 20  | 5.9 ± 1                              | 5.9 ± 1.4  | 4.3 ± 1.1 | 4.28*                                 | -25.9 ± 21.7 |
| Anterior cingulate R       | 2                    | 40  | 20  | 5.7 ± 0.9                            | 5.7 ± 1.2  | 4.1 ± 1.1 | 4.58*                                 | -26.2 ± 23.9 |
| subgenual L                | -2                   | 36  | -10 | 8.5 ± 2.5                            | 7.7 ± 2.3  | 5.8 ± 2.2 | 2.69*                                 | -23.1 ± 26.8 |
| subgenual R                | 6                    | 36  | -8  | 4.4 ± 1                              | 4.3 ± 1    | 3 ± 1.1   | 3.77*                                 | -27.5 ± 27.3 |
| Median cingulate L         | -2                   | -36 | 38  | 4 ± 0.8                              | 4.1 ± 1.1  | 3.2 ± 0.8 | 3.55*                                 | -19.7 ± 22.7 |
| Median cingulate R         | 4                    | 36  | 34  | 4.8 ± 1                              | 4.6 ± 1.3  | 3.4 ± 0.9 | 4.54*                                 | -23.6 ± 19.7 |
| Posterior cingulate L      | -8                   | -54 | 10  | 2.7 ± 0.6                            | 2.6 ± 0.6  | 2 ± 0.5   | 3.59*                                 | -20.9 ± 17.4 |
| Posterior cingulate R      | 6                    | -46 | 28  | 2.2 ± 0.6                            | 2.2 ± 0.7  | 1.7 ± 0.5 | 4.05*                                 | -20.7 ± 23.5 |
| Amygdala L                 | -26                  | 4   | -26 | 6.2 ± 1.2                            | 6.3 ± 1.7  | 4.1 ± 1.3 | 3.91*                                 | -31.8 ± 26.6 |
| Amygdala R                 | 26                   | 4   | -24 | 6.4 ± 1.6                            | 5.6 ± 1.7  | 4 ± 1.3   | 2.9*                                  | -26.1 ± 26   |
| Caput hippocampus L        | -24                  | -6  | -22 | 8.5 ± 2.6                            | 8.8 ± 3.2  | 5.8 ± 2.2 | 3.03*                                 | -30.6 ± 30.8 |
| Caput hippocampus R        | 26                   | -2  | -24 | 5.4 ± 1                              | 4.9 ± 1.1  | 3.5 ± 1.4 | 2.86*                                 | -27.8 ± 24.4 |
| Insula L                   | -40                  | 20  | -10 | 4.3 ± 1.3                            | 4.3 ± 1.2  | 3.3 ± 1.1 | 4.44*                                 | -24.6 ± 14.1 |
| Insula R                   | 44                   | -12 | 2   | 4.8 ± 0.9                            | 5 ± 1.4    | 3.4 ± 1   | 4.72*                                 | -28.9 ± 24.5 |
| <b>Subcortical areas</b>   |                      |     |     |                                      |            |           |                                       |              |
| Nucleus caudatus L         | -14                  | 6   | -10 | 0.6 ± 0.1                            | 0.6 ± 0.1  | 0.5 ± 0.1 | 1,80                                  | -14.5 ± 27.1 |
| Nucleus caudatus R         | 12                   | 8   | -8  | 0.6 ± 0.2                            | 0.6 ± 0.1  | 0.5 ± 0.2 | 2,04                                  | -19.3 ± 44.7 |
| Putamen L                  | -18                  | 4   | -10 | 0.5 ± 0.1                            | 0.6 ± 0.1  | 0.5 ± 0.2 | 2,14                                  | -18.5 ± 29.9 |
| Putamen R                  | 14                   | 8   | -8  | 0.5 ± 0.1                            | 0.5 ± 0.1  | 0.4 ± 0.2 | 1,70                                  | -15.8 ± 48.7 |
| Thalamus L                 | -14                  | -24 | 4   | 0.4 ± 0.1                            | 0.5 ± 0.2  | 0.4 ± 0.1 | 2,23                                  | -12.1 ± 37.7 |
| Thalamus R                 | 6                    | -12 | 4   | 0.6 ± 0.2                            | 0.6 ± 0.2  | 0.5 ± 0.2 | 2,73*                                 | -16.8 ± 27   |
| <b>Brainstem</b>           |                      |     |     |                                      |            |           |                                       |              |
| Median raphe nucleus       | -4                   | -34 | -20 | 1.5 ± 0.5                            | 1.4 ± 0.6  | 1.2 ± 0.4 | 1,30                                  | -6.5 ± 30.7  |
| Dorsal raphe nucleus       | -2                   | -28 | -8  | 1.2 ± 0.4                            | 1.1 ± 0.5  | 1 ± 0.3   | 1,15                                  | -5.7 ± 26.4  |
